# Supplementary material for: Tracing Genetic Exchange and Biogeography of Cryptococcus neoformans var. grubii at the Global Population Level
Source: PubMed Central journal article supplement (PMC5586382; doi:10.1534/genetics.117.203836), 2017-07-05

A. Bt125 VNI regions

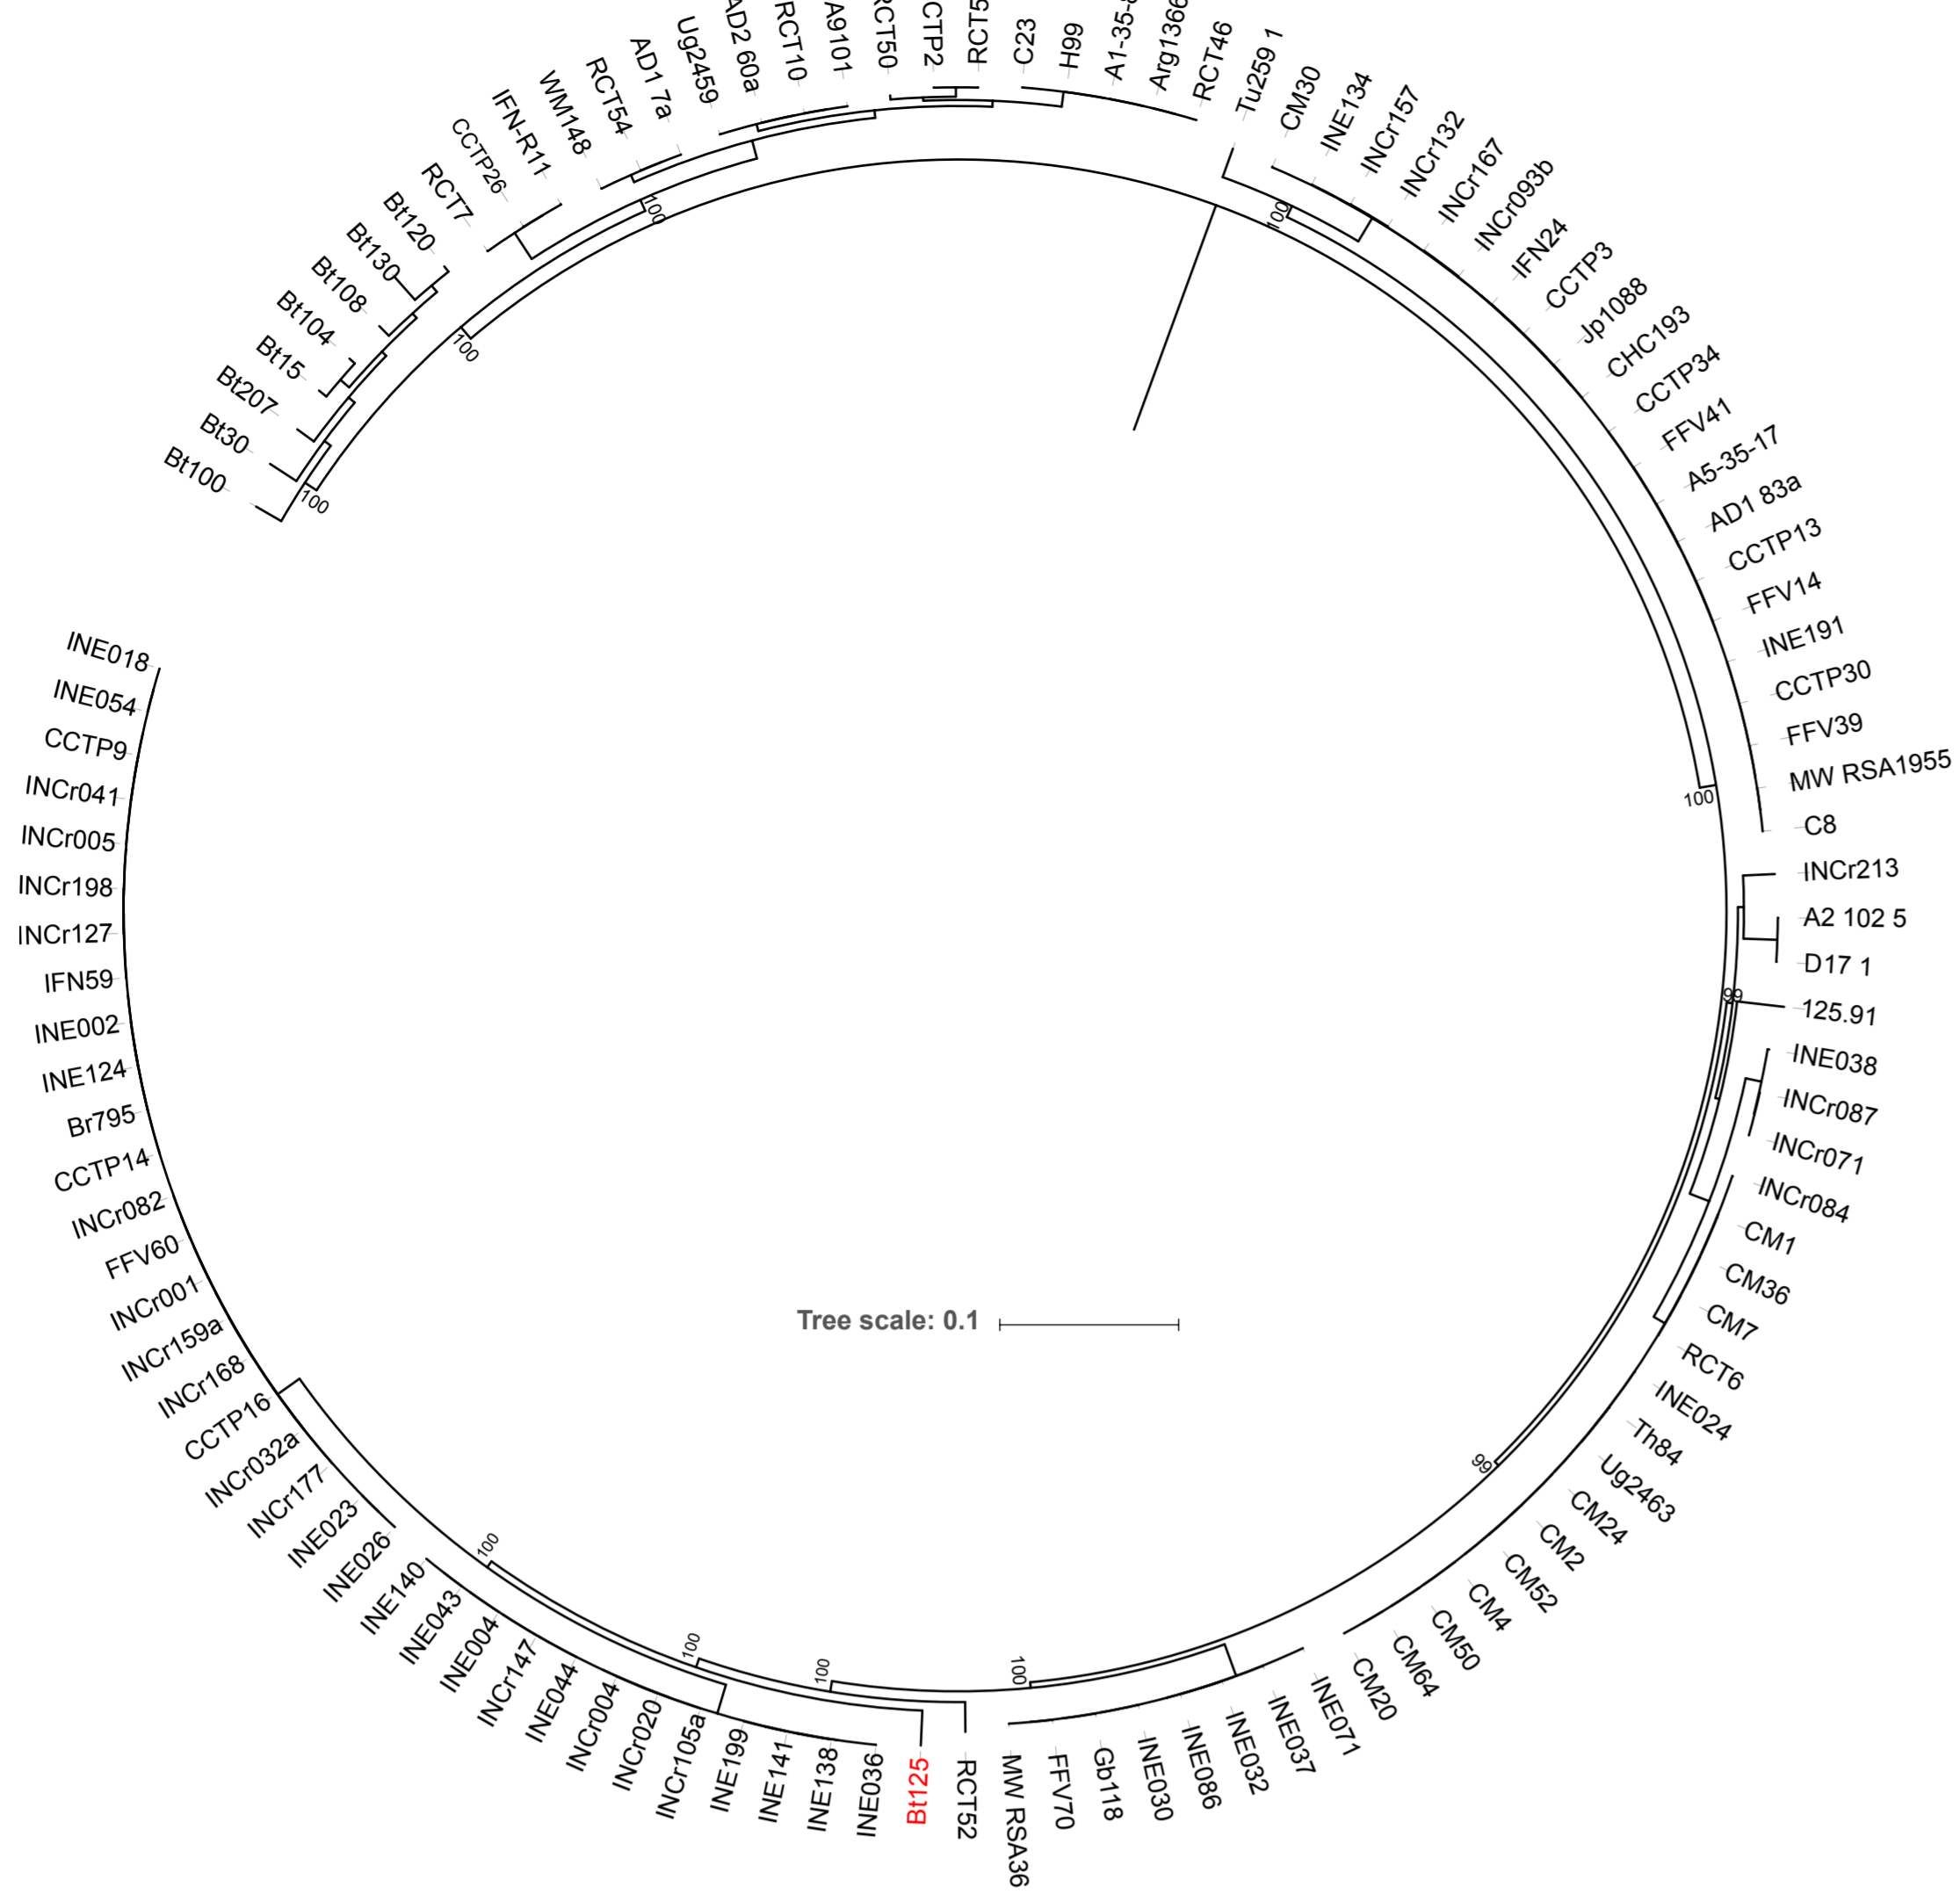

B. Bt125 VNB regions

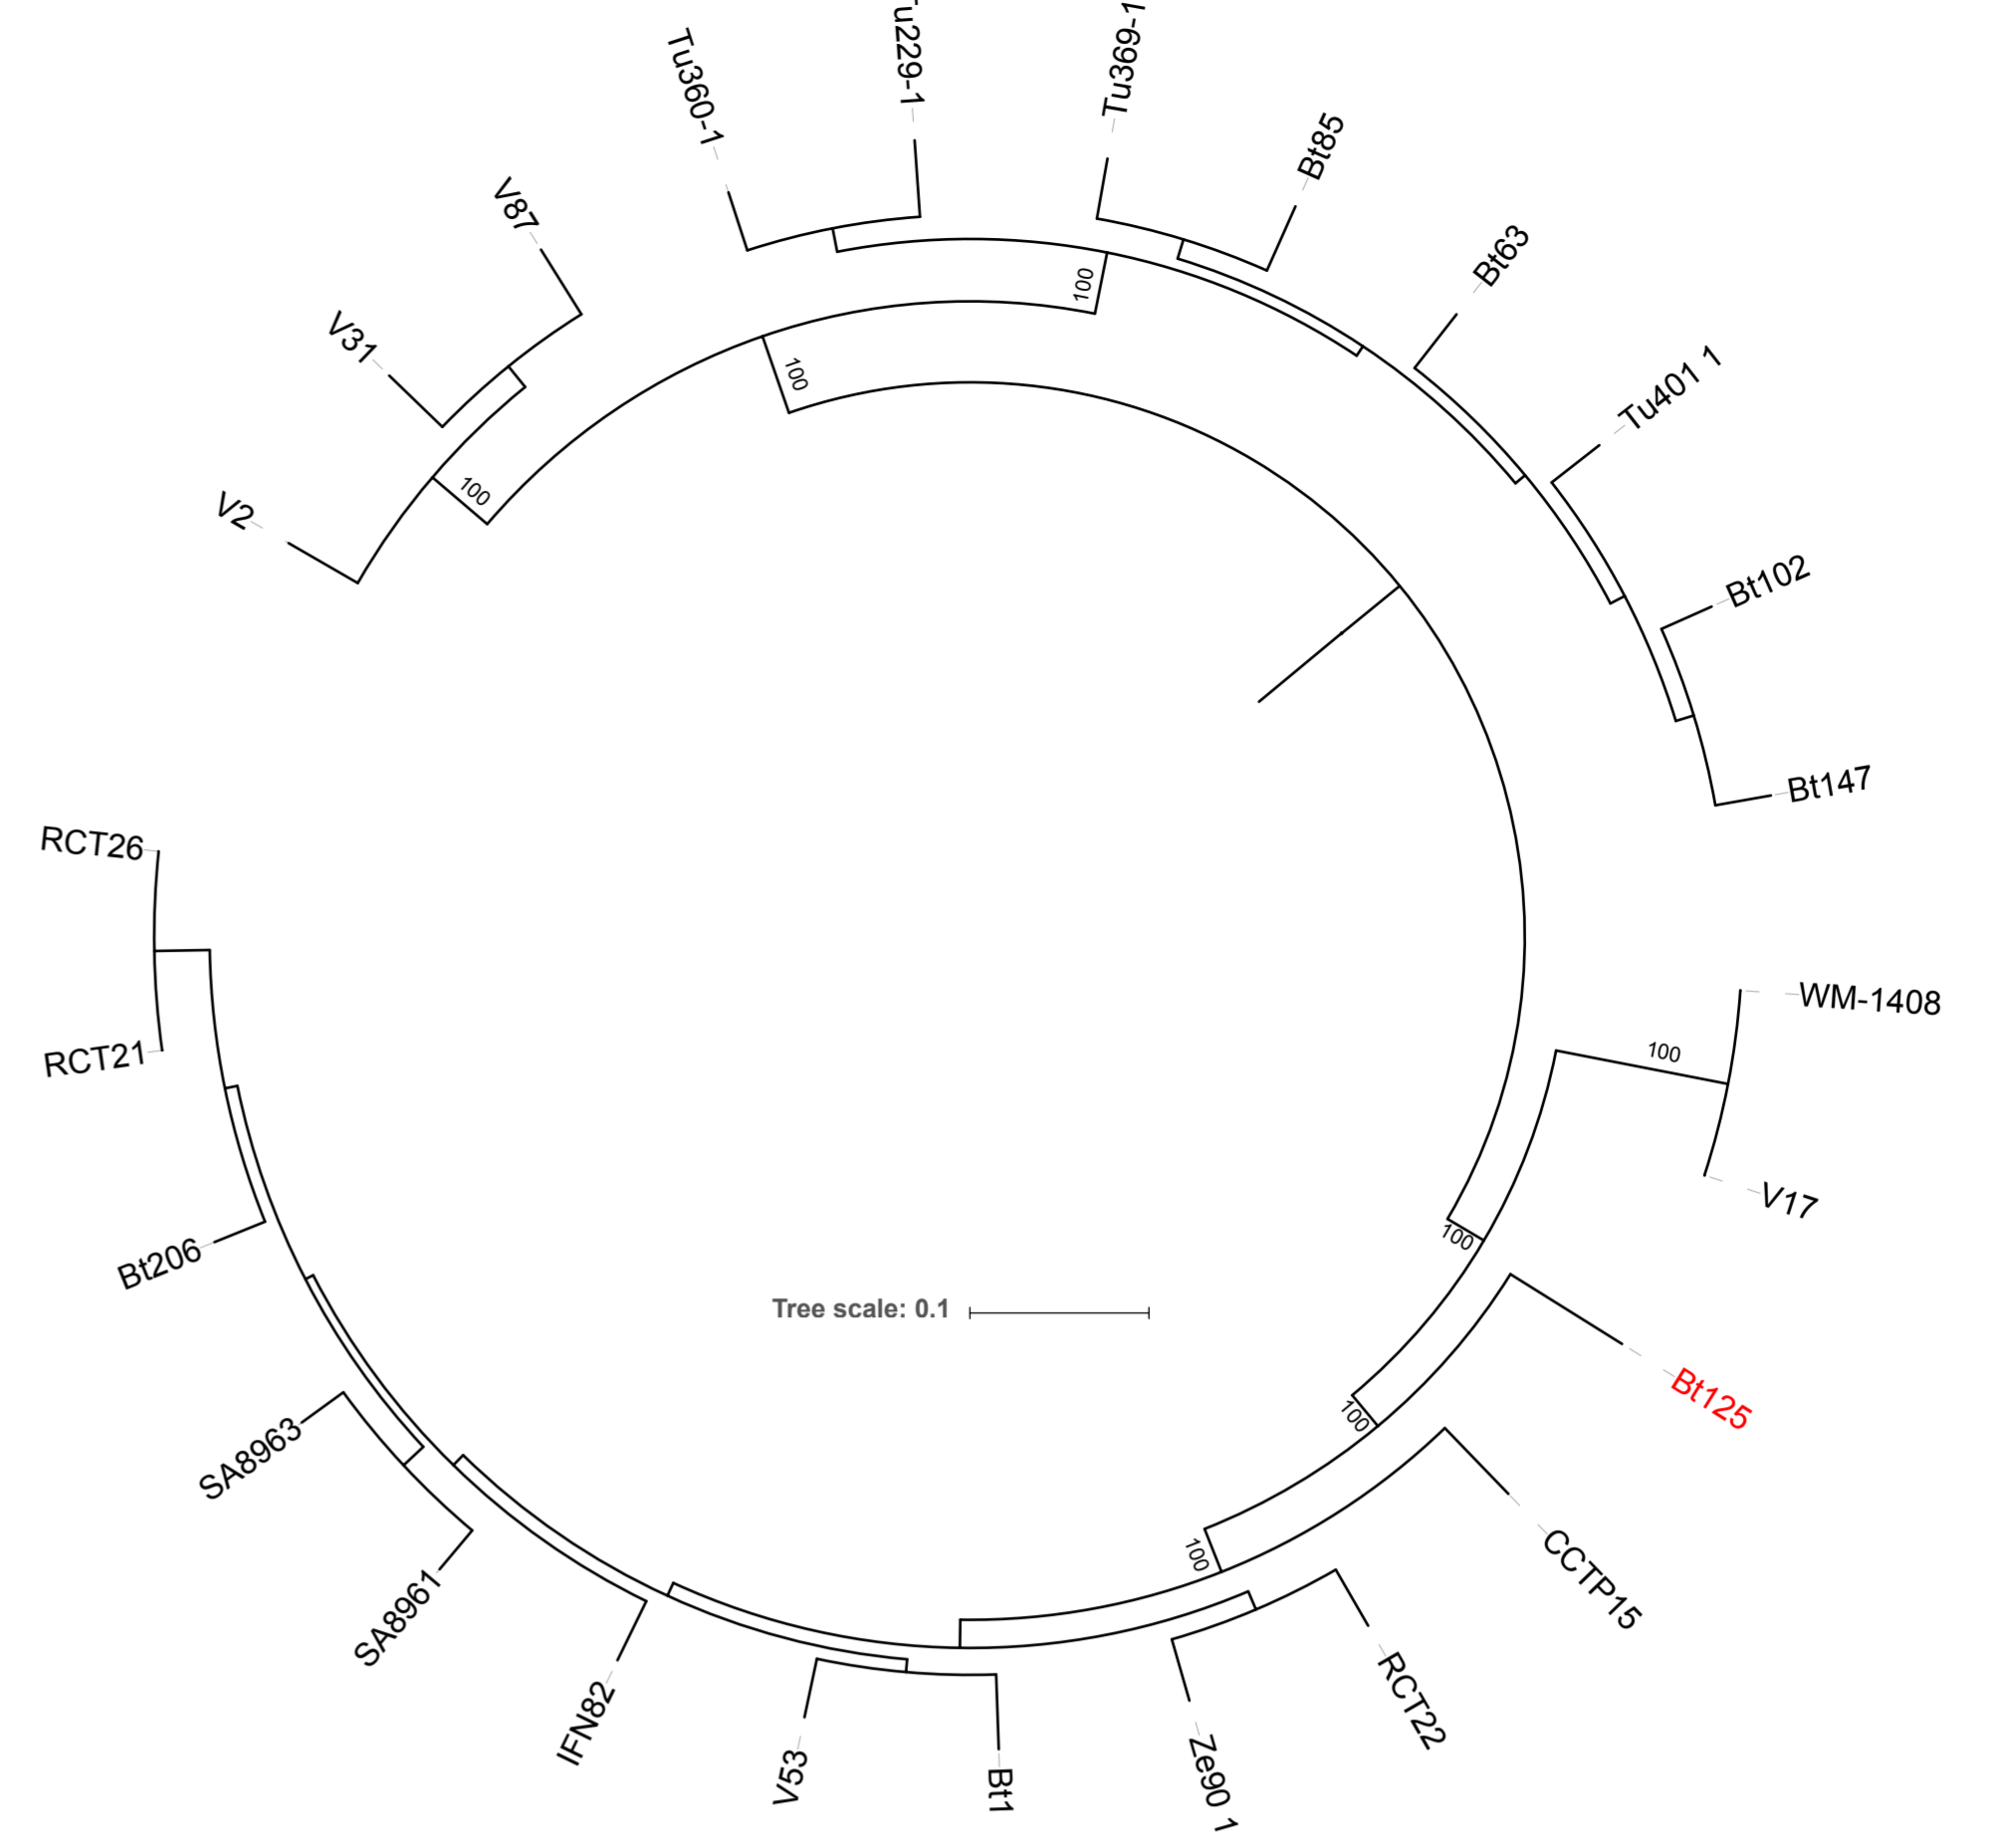

C. Bt131 VNI regions

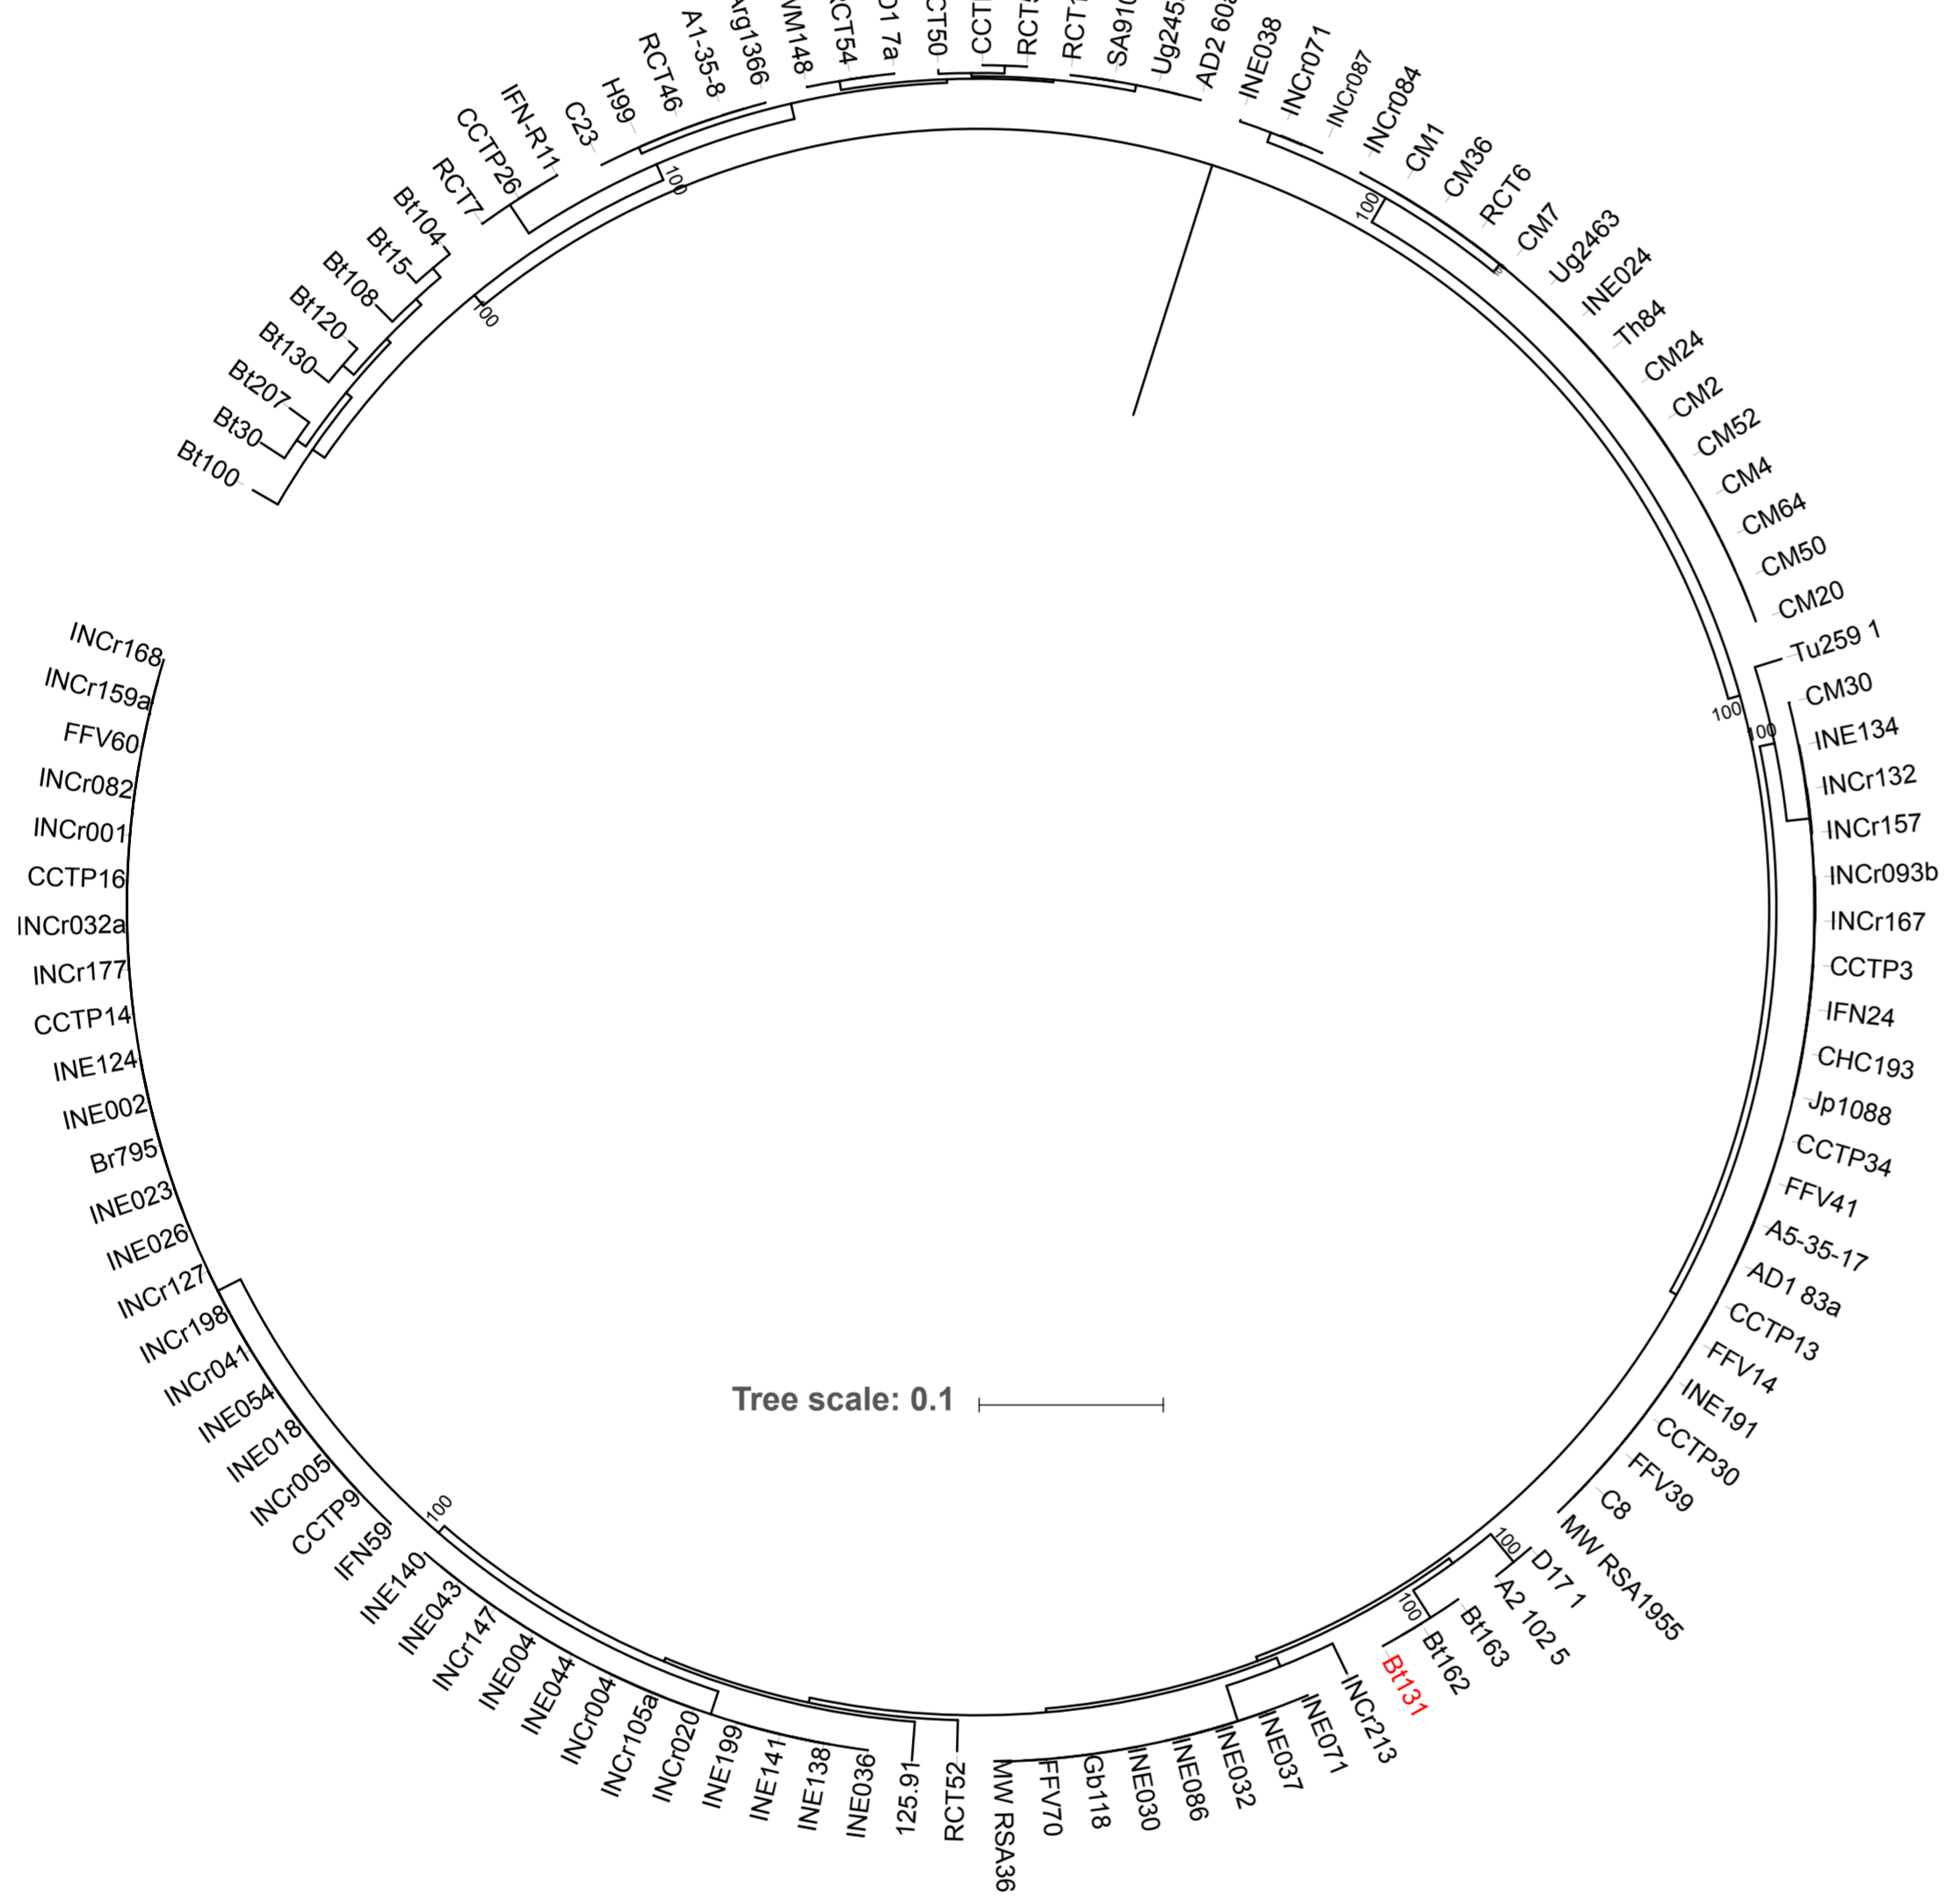

D. Bt131 VNB regions

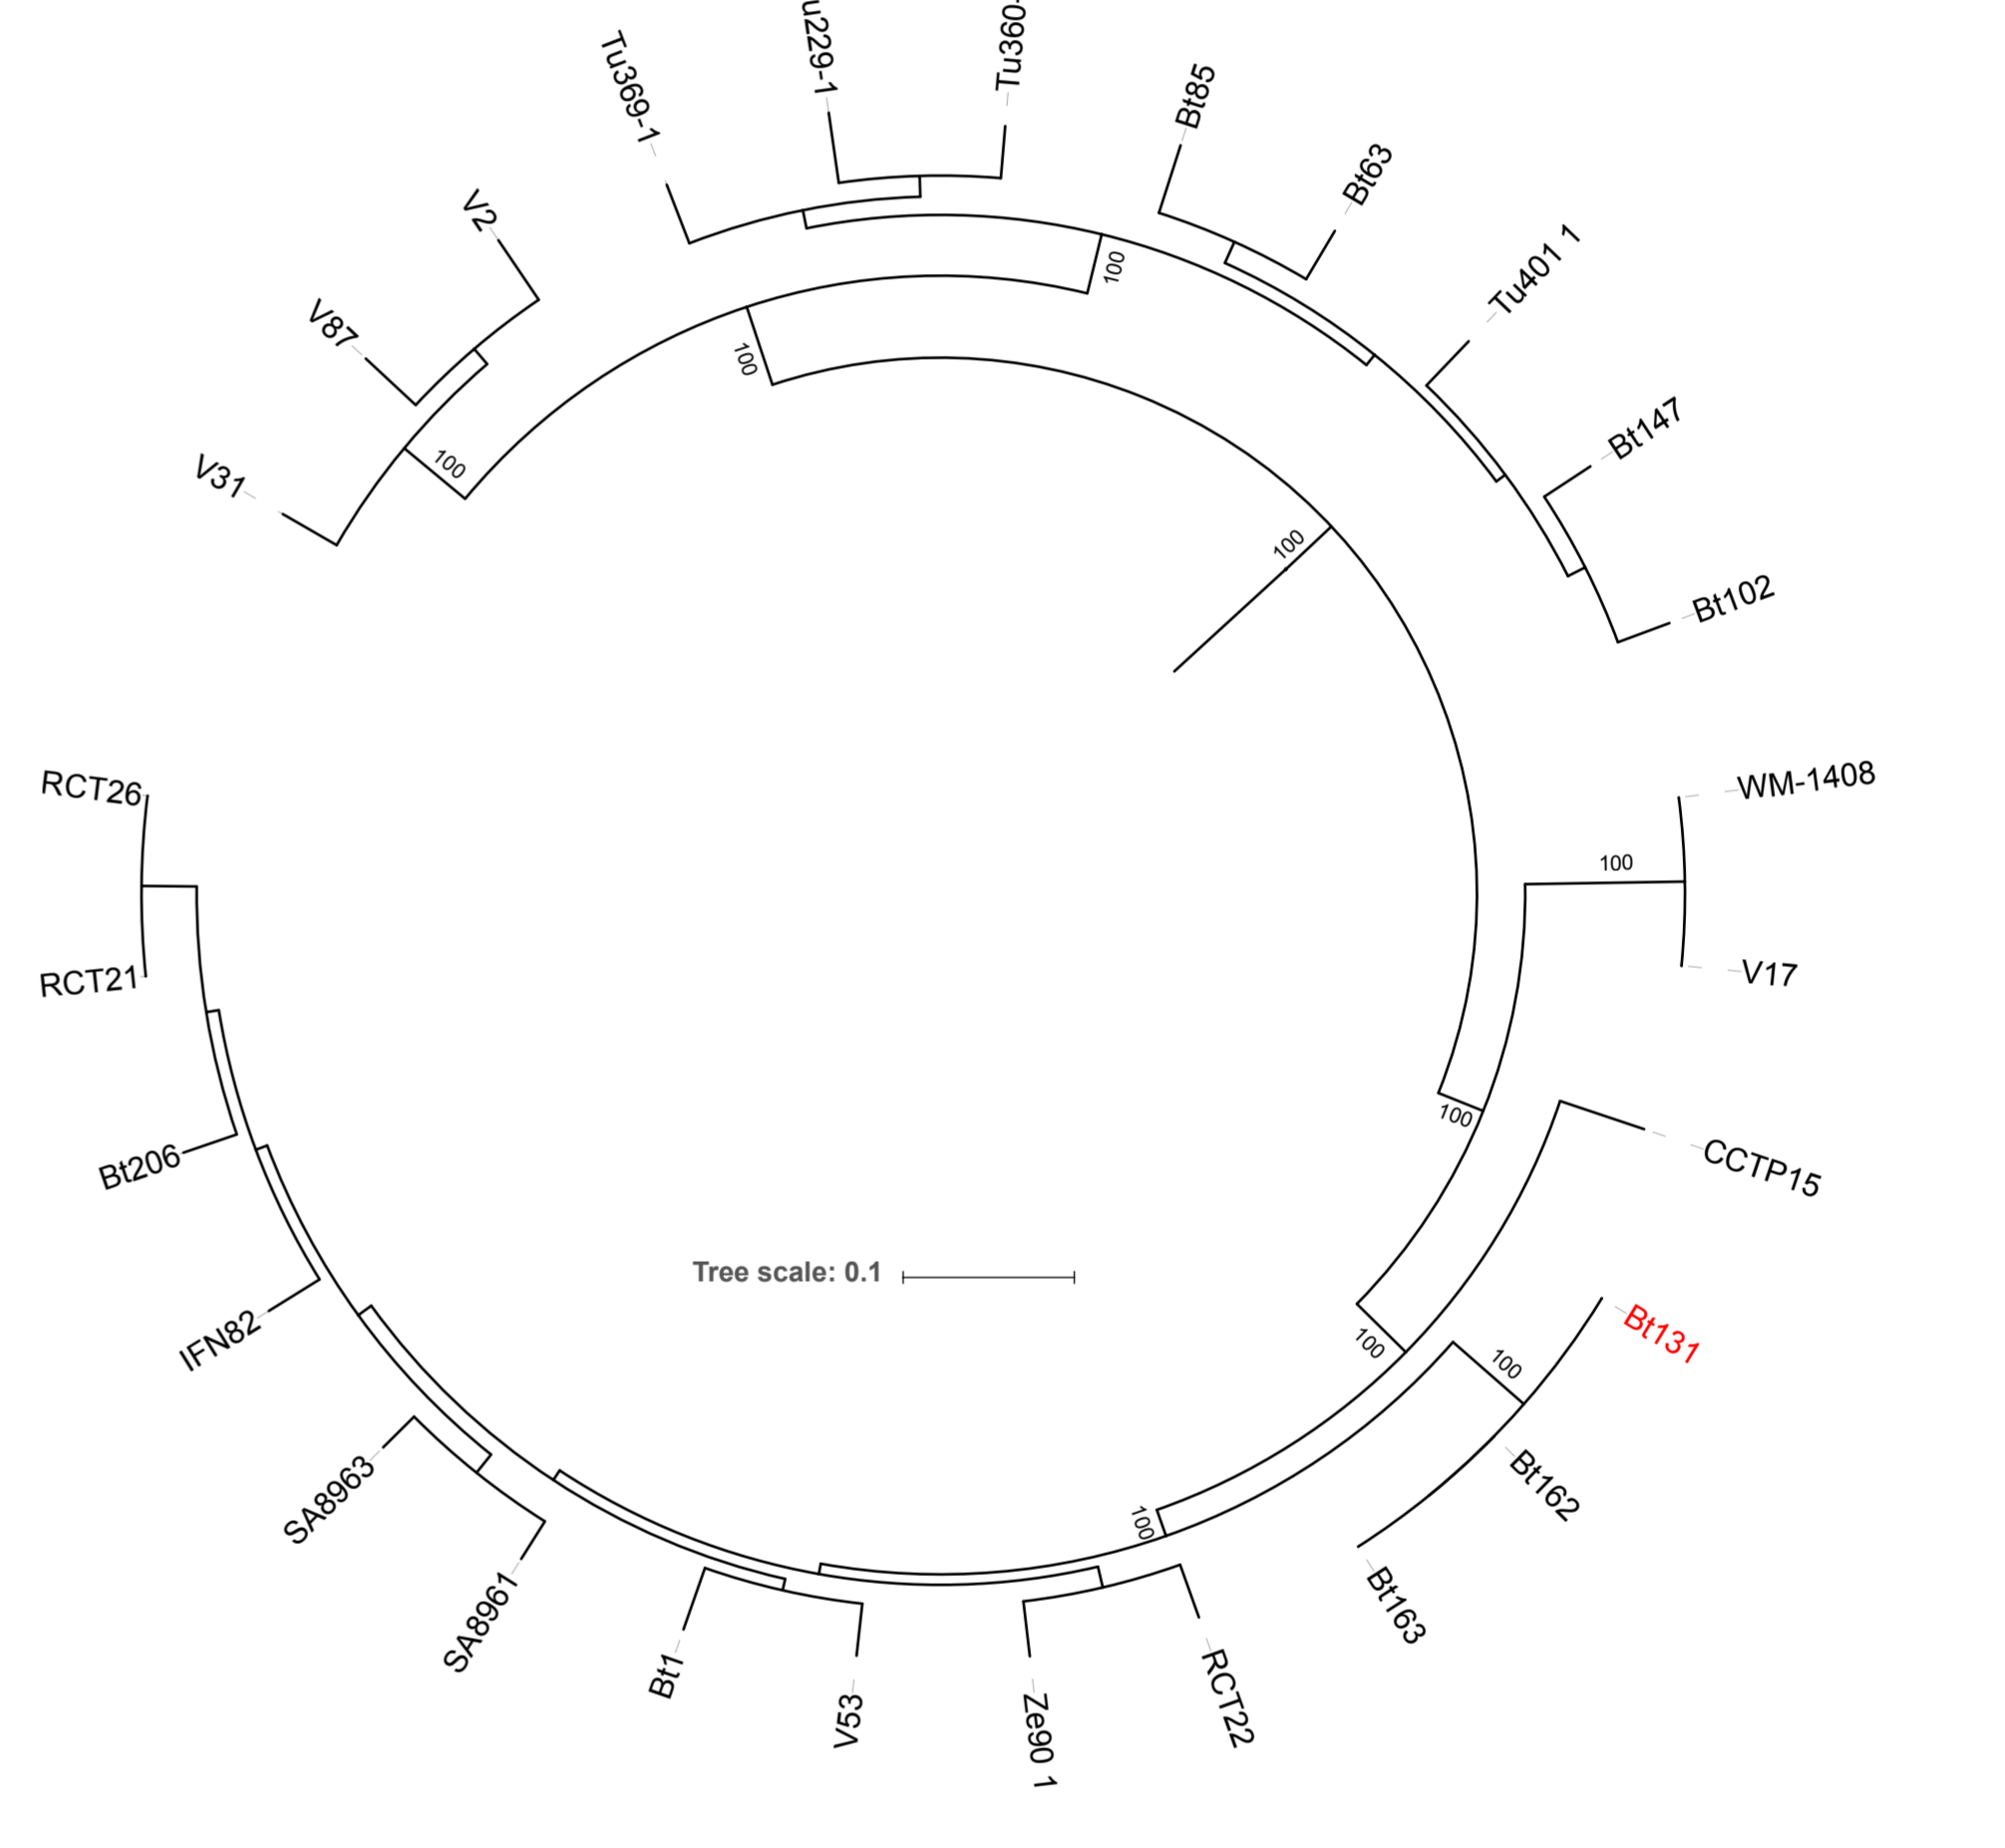

E. Ftc260-1 VNI regions

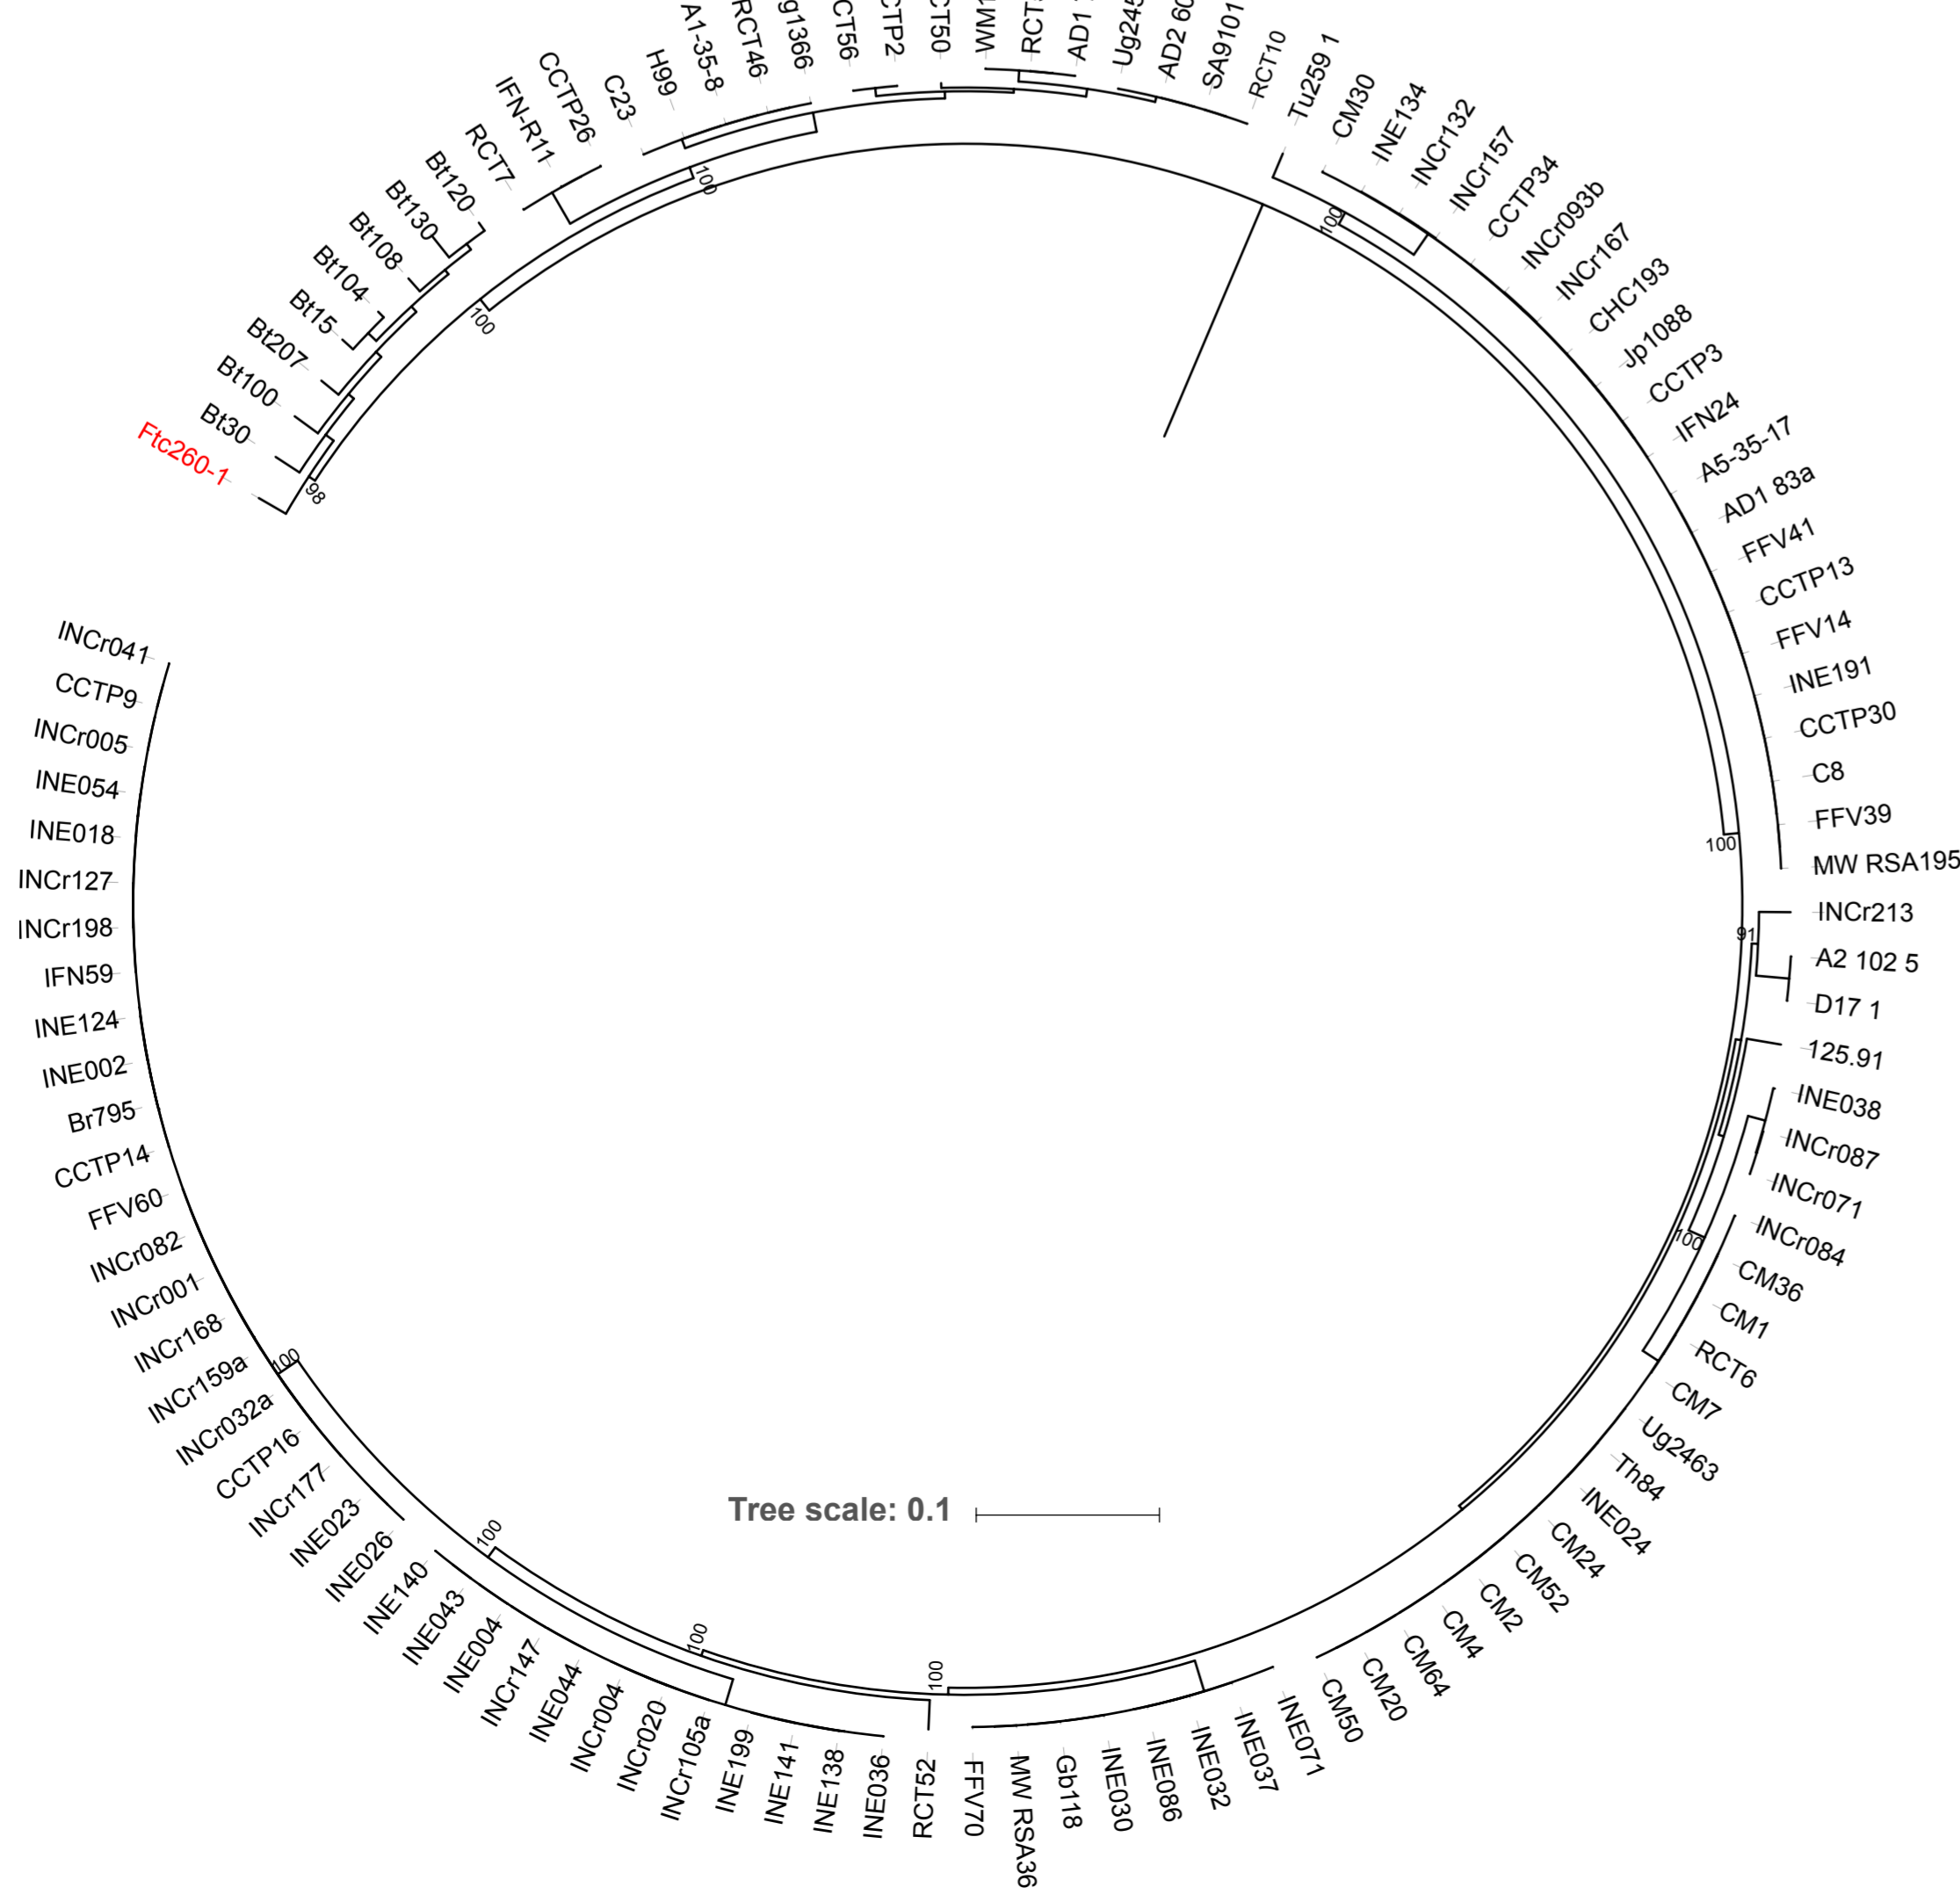

F. Ftc260-1 VNB regions

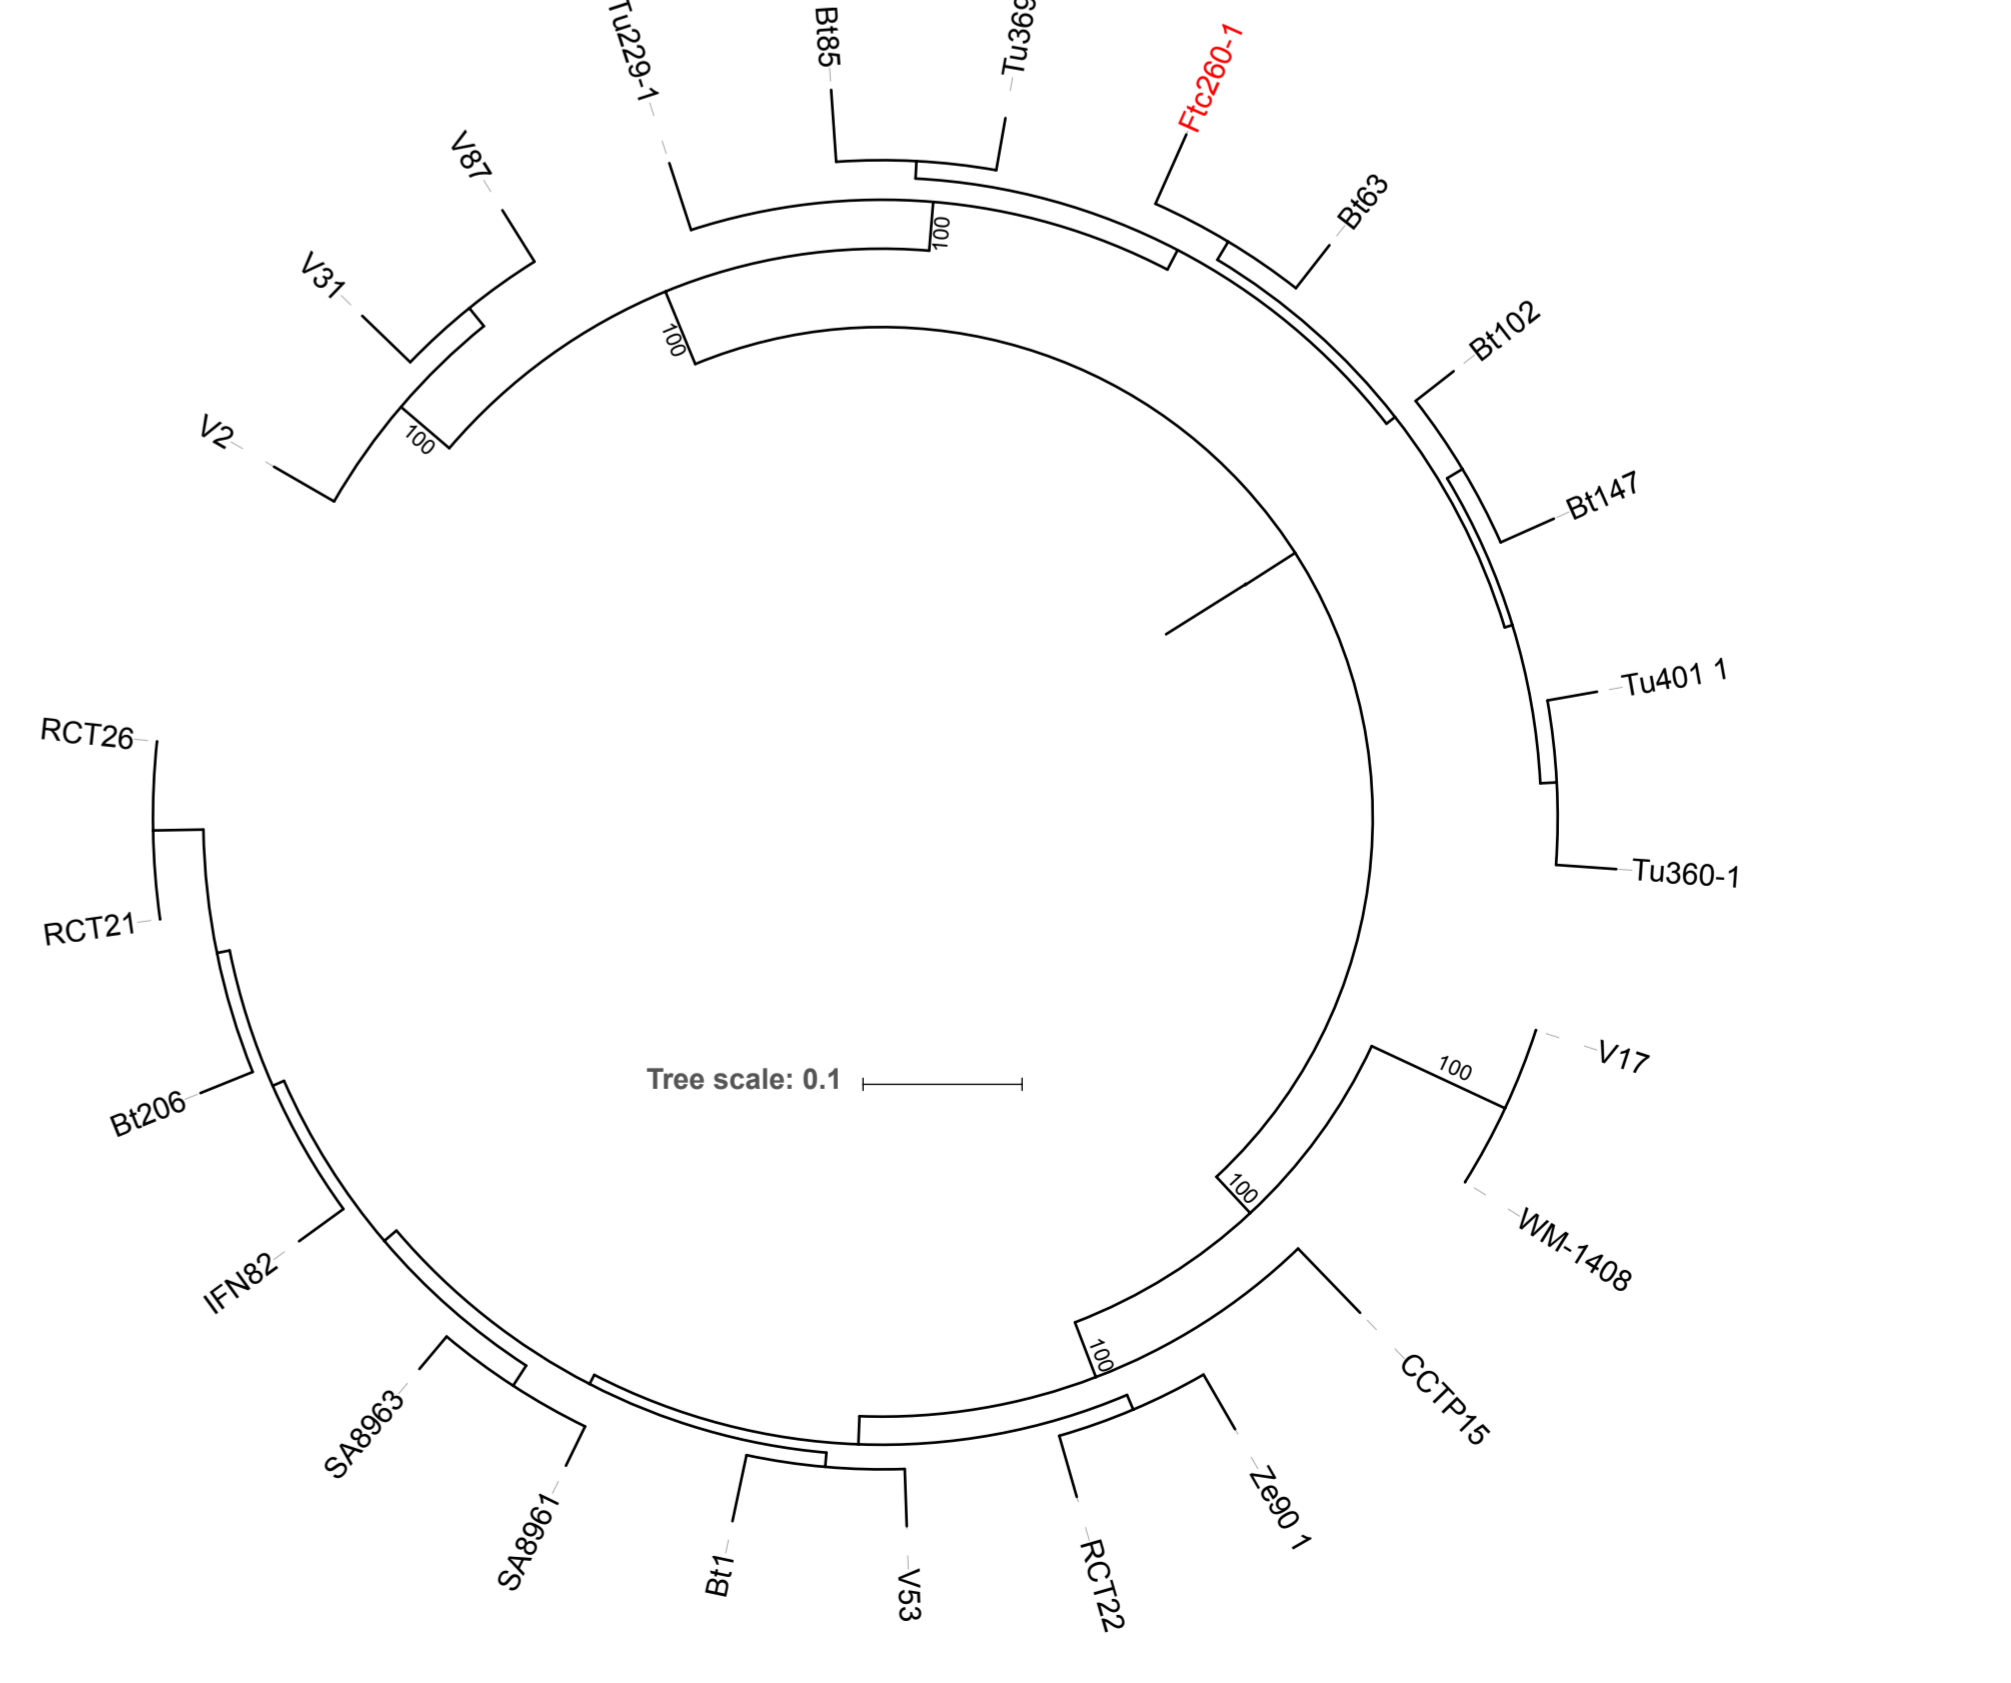

Supplement: 327FigureS2.pdf [file 327FigureS2.pdf]
