# Supplementary material for: Tracing Genetic Exchange and Biogeography of Cryptococcus neoformans var. grubii at the Global Population Level
Source: PubMed Central journal article supplement (PMC5586382; doi:10.1534/genetics.117.203836), 2017-07-05

A.

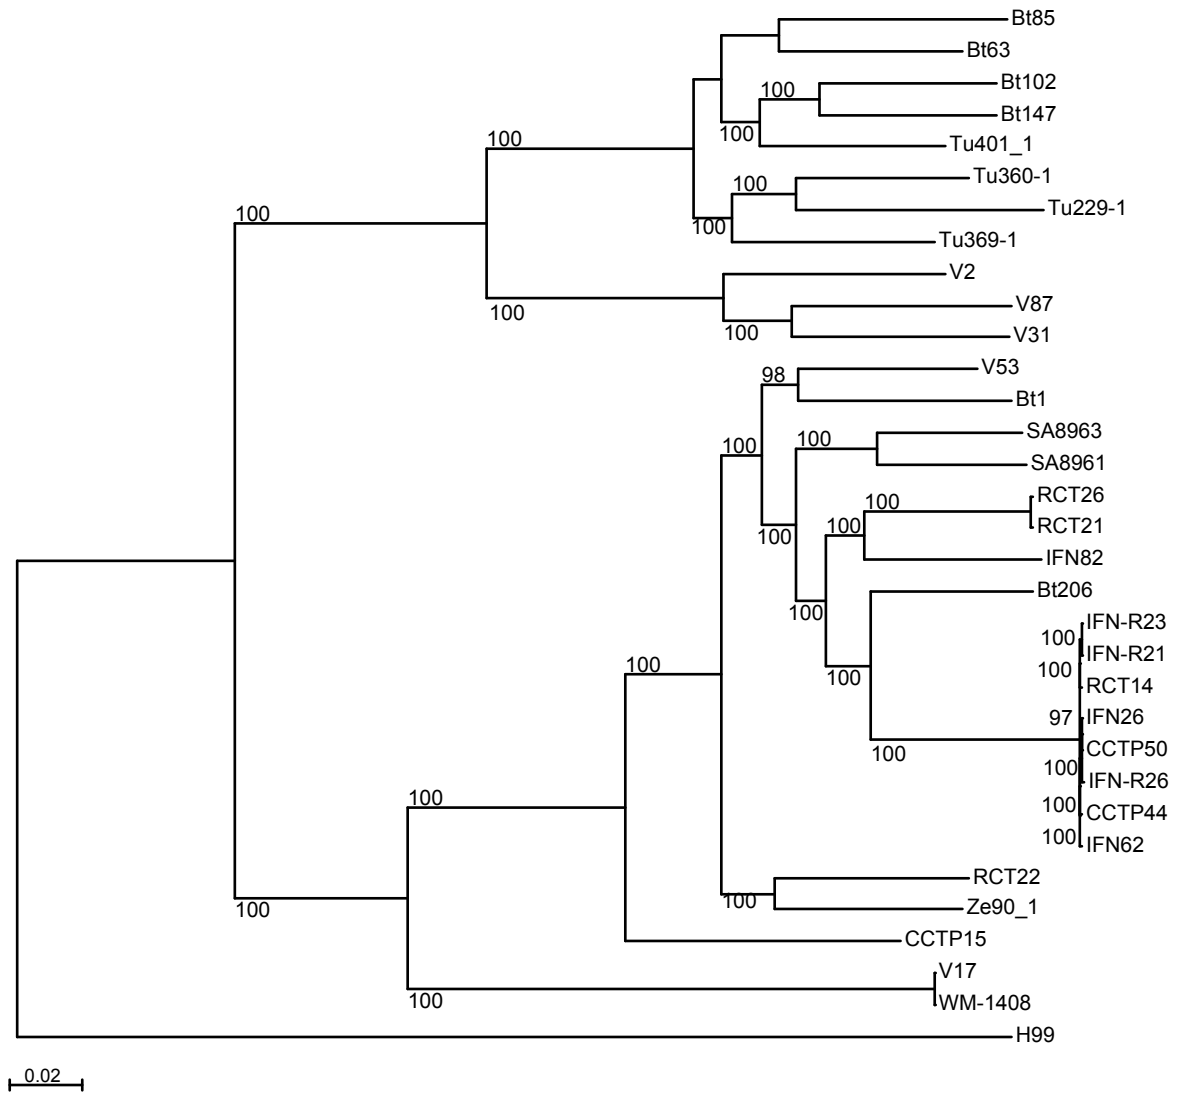

B.

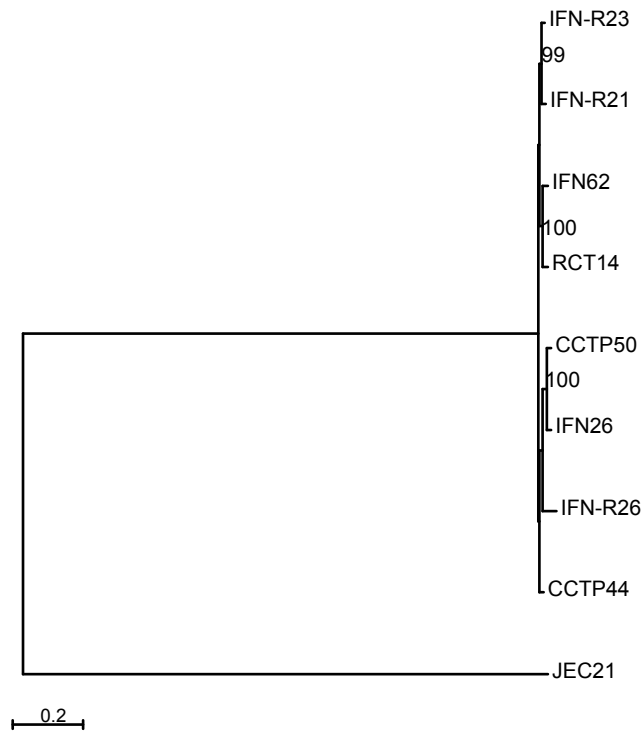

Supplement: 327FigureS5.pdf [file 327FigureS5.pdf]
